# Supplementary material for: Facilitation of axonal transcriptome analysis with quantitative microfluidic devices
Source: Royal Society of Chemistry journal article supplement (doi:10.1039/d2lc01183b), 2023-01-01
Supplement: d2lc01183b1.pdf [file d2lc01183b1.pdf]

## Electronic Supplementary Information

### Facilitation of axonal transcriptome analysis with quantitative microfluidic devices†

Zhuoxuan Yang ‡<sup>a</sup>, Jun Yu ‡<sup>a</sup>, Jian Zhang ‡<sup>a</sup>, Huixue Song ‡<sup>b</sup>, Haixia Ye ‡<sup>b</sup>, Jianhui Liu ‡<sup>a</sup>, Nijia Wang ‡<sup>a</sup>,  
Pengfei Che<sup>a</sup>, Gaoxin Long<sup>a</sup>, Yunxuan Wang<sup>a</sup>, Jaewon Park<sup>\*bc</sup> and Sheng-Jian Ji<sup>\*a</sup>

<sup>a</sup> School of Life Sciences, Department of Neuroscience, Brain Research Center, Shenzhen Key Laboratory of Gene Regulation and Systems Biology, Southern University of Science and Technology, Shenzhen 518055, Guangdong, China. E-mail: [jisj@SUSTech.edu.cn](mailto:jisj@SUSTech.edu.cn)

<sup>b</sup> School of Microelectronics, Southern University of Science and Technology, Shenzhen 518055, Guangdong, China.

<sup>c</sup> OJeong Resilience Institute (OJERI), Korea University, Seoul, 02841, Korea. E-mail: [netjay@korea.ac.kr](mailto:netjay@korea.ac.kr)

† Electronic supplementary information (ESI) available.

‡ These authors contributed equally to this work.

**This file contains:**

**---Table S1 legend**

**---Fig. S1**

**Table S1 Gene lists for axon RNAs.**

Sheet 1. All axon RNAs identified in DG-GC neurons.

Sheet 2. All axon RNAs identified in DRG neurons.

Sheet 3. All axon RNAs identified in RGC neurons.

Sheet 4. Overlapping axon RNAs found in all three neuron types.

Sheet 5. Axon RNAs specific to DG-GC neurons.

Sheet 6. Axon RNAs specific to DRG neurons.

Sheet 7. Axon RNAs specific to RGC neurons.

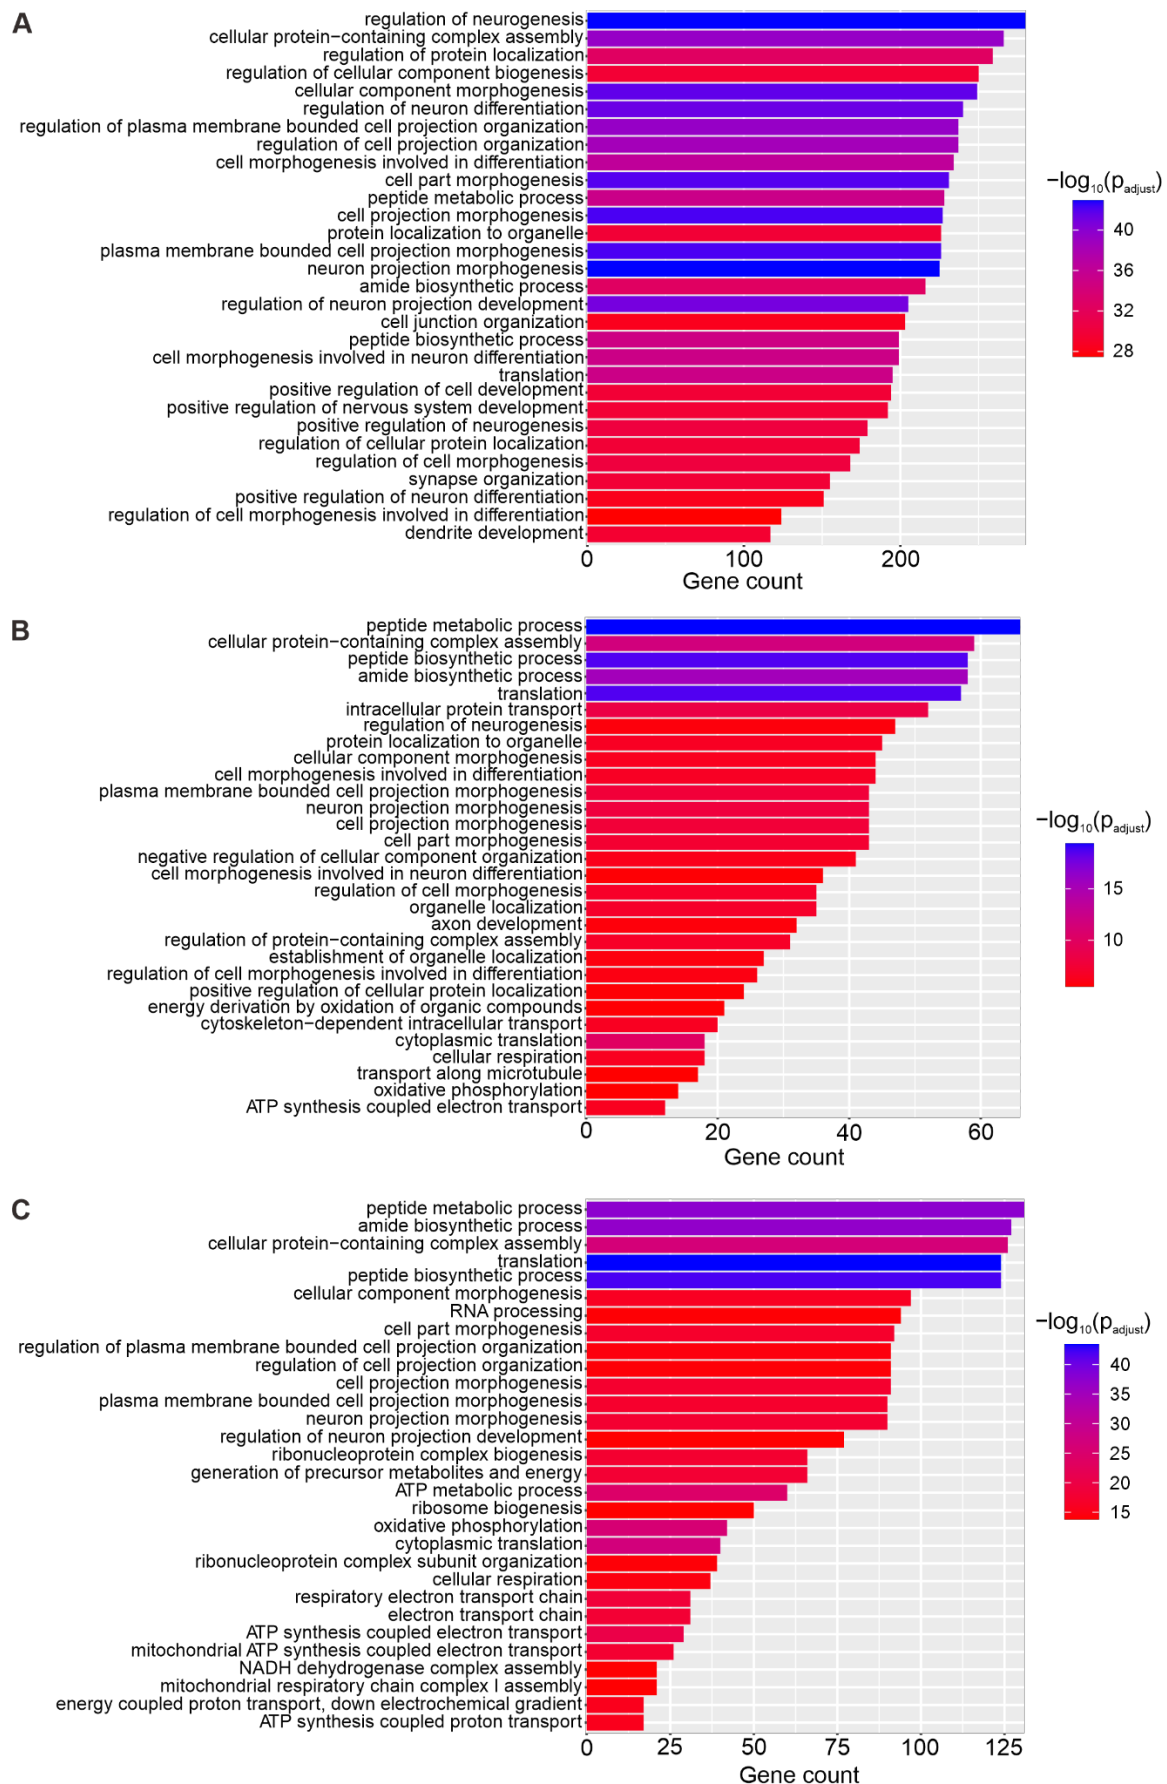

**Fig. S1 GO analysis of axonal RNAs expressed in DG-GC, RGC, or DRG neurons.**

- (A) The GO terms in Biological Process of axon RNAs from DG-GC neurons.
- (B) The GO terms in Biological Process of axon RNAs from RGC neurons.
- (C) The GO terms in Biological Process of axon RNAs from DRG neurons.
